# Supplementary material for: Thermostable birefringent copolyimide films based on azobenzene-containing pyrimidine diamines
Source: Royal Society of Chemistry journal article supplement (doi:10.1039/c7tc02958f), 2017-01-01
Supplement: c7tc02958f1.pdf [file c7tc02958f1.pdf]

## Supporting Information

### Thermostable birefringent copolyimide films based on azobenzene- containing pyrimidine diamines

Faqin Tong, Zhao Chen, Xuemin Lu\*, and Qinghua Lu\*

School of Chemistry and Chemical Engineering, Shanghai Key Laboratory of Electrical Insulation and

Thermal Aging, Shanghai Jiao Tong University, Shanghai 200240, P. R. China

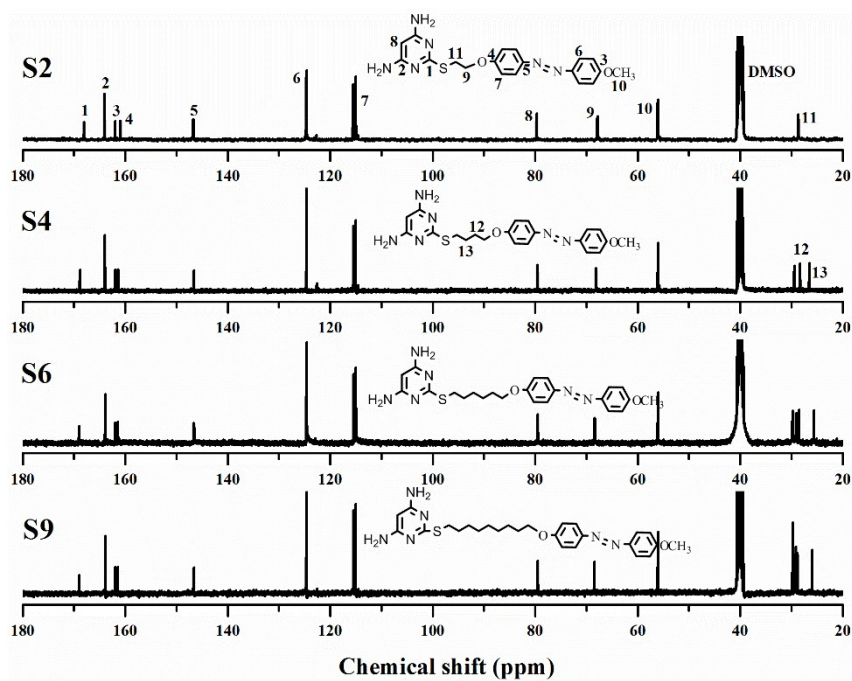

Figure S1.  $^{13}\text{C}$  NMR spectra of diamines in  $[\text{D}_6]$  DMSO.

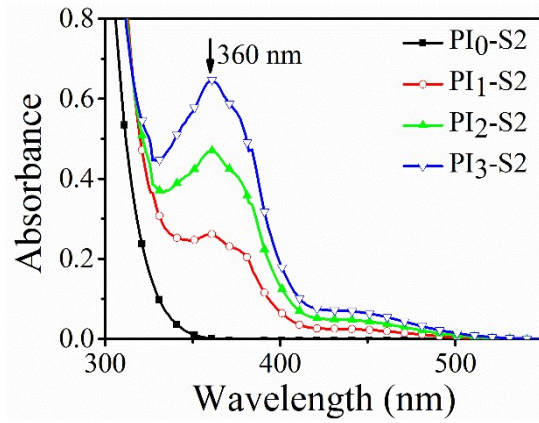

**Figure S2.** UV-vis absorption spectra of the PAAs of **Plx-S2** in DMAc solution (concentration 0.05 mg/mL).

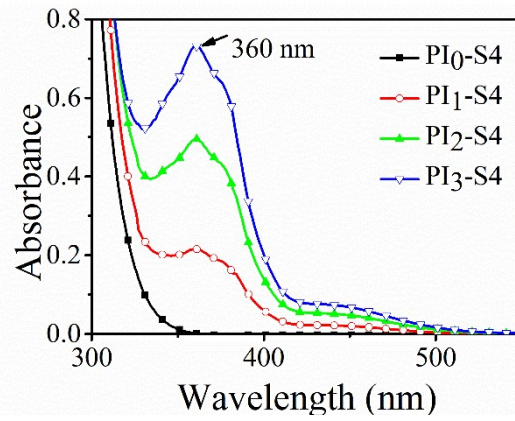

**Figure S3.** UV-vis absorption spectra of the PAAs of **Plx-S4** in DMAc solution (concentration 0.05 mg/mL).

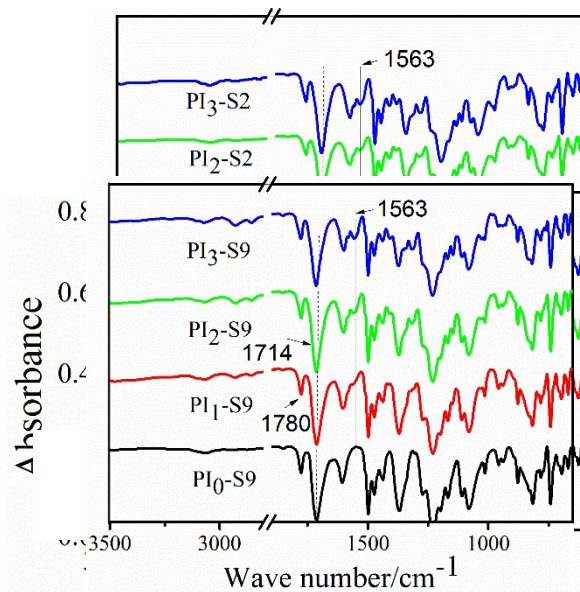

**Fi**

**Figure S7.** ATR FTIR spectra of **Plx-S9**.

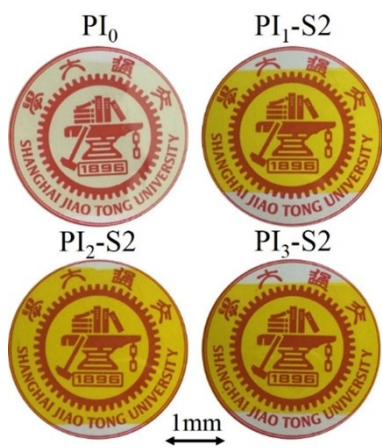

Figure S8. Optical photographs of **PIx-S2** films.

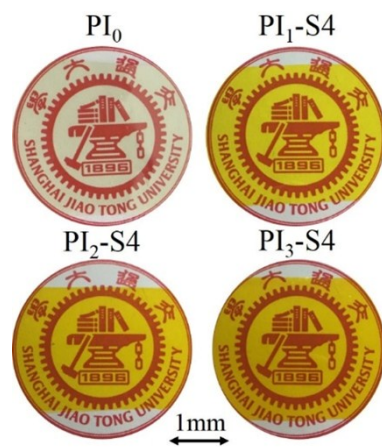

Figure S9. Optical photographs of **PIx-S4** films.

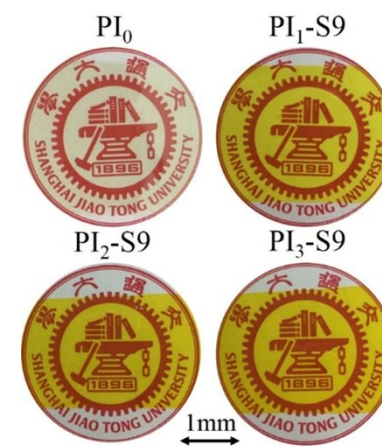

Figure S10. Optical photographs of **PIx-S9** films.

**Table S1.** Thermal performances of PIs and molecular weights of PAAs.

| <b>PIs</b>                        | <b><math>T_g^b</math><br/>(°C)</b> | <b><math>T_{d5}^c</math><br/>(°C)</b> | <b><math>T_{d10}^c</math><br/>(°C)</b> | <b><math>R_w^d</math><br/>(%)</b> | <b><math>M_n^e</math><br/>(<math>\times 10^{-4}</math>)</b> | <b><math>M_w^e</math><br/>(<math>\times 10^{-4}</math>)</b> | <b><math>M_w/M_n</math></b> |
|-----------------------------------|------------------------------------|---------------------------------------|----------------------------------------|-----------------------------------|-------------------------------------------------------------|-------------------------------------------------------------|-----------------------------|
| <b>PI<sub>0</sub><sup>a</sup></b> | 245                                | 514                                   | 552                                    | 54.9                              | 12.09                                                       | 23.15                                                       | 1.91                        |
| <b>PI<sub>1</sub>-S2</b>          | 229                                | 394                                   | 500                                    | 57.3                              | 3.71                                                        | 7.75                                                        | 2.09                        |
| <b>PI<sub>2</sub>-S2</b>          | 207                                | 376                                   | 432                                    | 55.2                              | 1.81                                                        | 4.57                                                        | 2.52                        |
| <b>PI<sub>3</sub>-S2</b>          | 202                                | 374                                   | 407                                    | 51.7                              | 1.09                                                        | 3.19                                                        | 2.92                        |
| <b>PI<sub>1</sub>-S4</b>          | 235                                | 465                                   | 492                                    | 56.9                              | 3.59                                                        | 7.69                                                        | 2.14                        |
| <b>PI<sub>2</sub>-S4</b>          | 219                                | 431                                   | 458                                    | 46.5                              | 2.78                                                        | 5.35                                                        | 1.93                        |
| <b>PI<sub>3</sub>-S4</b>          | 199                                | 401                                   | 435                                    | 53.7                              | 1.57                                                        | 3.02                                                        | 1.93                        |
| <b>PI<sub>1</sub>-S6</b>          | 224                                | 453                                   | 522                                    | 56.5                              | 2.67                                                        | 5.18                                                        | 1.94                        |
| <b>PI<sub>2</sub>-S6</b>          | 214                                | 424                                   | 465                                    | 47.3                              | 2.28                                                        | 4.15                                                        | 1.82                        |
| <b>PI<sub>3</sub>-S6</b>          | 196                                | 414                                   | 444                                    | 49.3                              | 1.78                                                        | 4.29                                                        | 2.41                        |
| <b>PI<sub>1</sub>-S9</b>          | 226                                | 412                                   | 465                                    | 51.8                              | 1.60                                                        | 3.94                                                        | 2.46                        |
| <b>PI<sub>2</sub>-S9</b>          | 191                                | 400                                   | 440                                    | 50.1                              | 1.24                                                        | 3.49                                                        | 2.81                        |
| <b>PI<sub>3</sub>-S9</b>          | 174                                | 370                                   | 408                                    | 40.7                              | 1.59                                                        | 3.69                                                        | 2.32                        |

<sup>a</sup> PI<sub>0</sub> was prepared by polymerization of ODA and ODPA. <sup>b</sup> From the second DSC heating scan at a heating rate of 20 °C/min in nitrogen. <sup>c</sup> Temperatures corresponding to 5% and 10% weight losses by thermogravimetry at a heating rate of 20 °C/min in nitrogen. <sup>d</sup> Residual weight % at 700 °C. <sup>e</sup> Measured by GPC in DMF; polystyrene was used as a standard.

**Table S2.** Sample IDs, compositions, and mechanical properties of co-polyimide films.

| Sample ID                    | Sn:ODA | Film quality | Tensile strength (MPa) | Elongation at break (%) | Tensile modulus (GPa) |
|------------------------------|--------|--------------|------------------------|-------------------------|-----------------------|
| PI <sub>0</sub> <sup>a</sup> | 0:1    | flexible     | 126.8                  | 9.6                     | 2.34                  |
| PI <sub>1</sub> -S2          | 1:9    | flexible     | 139.1                  | 7.6                     | 2.75                  |
| PI <sub>2</sub> -S2          | 2:8    | flexible     | 81.9                   | 3.7                     | 1.98                  |
| PI <sub>3</sub> -S2          | 3:7    | rigid        | --                     | --                      | --                    |
| PI <sub>1</sub> -S4          | 1:9    | flexible     | 109.1                  | 6.6                     | 2.10                  |
| PI <sub>2</sub> -S4          | 2:8    | flexible     | 94.3                   | 5.5                     | 1.97                  |
| PI <sub>3</sub> -S4          | 3:7    | flexible     | 64.3                   | 3.1                     | 3.02                  |
| PI <sub>1</sub> -S6          | 1:9    | flexible     | 94.2                   | 5.1                     | 1.94                  |
| PI <sub>2</sub> -S6          | 2:8    | flexible     | 96.7                   | 5.0                     | 2.15                  |
| PI <sub>3</sub> -S6          | 3:7    | flexible     | 83.5                   | 5.3                     | 2.19                  |
| PI <sub>1</sub> -S9          | 1:9    | flexible     | 75.2                   | 3.8                     | 2.16                  |
| PI <sub>2</sub> -S9          | 2:8    | flexible     | 65.6                   | 4.3                     | 2.02                  |
| PI <sub>3</sub> -S9          | 3:7    | flexible     | 73.9                   | 4.8                     | 1.85                  |

<sup>a</sup>PI<sub>0</sub> was prepared by polymerization of ODA and ODPA.

The <sup>1</sup>H NMR of PAAs and elemental analysis of PIs were recorded to confirm the synthesis of azo-PIs as following:

**PAA<sub>0</sub>:** <sup>1</sup>H NMR (400 MHz, [D<sub>6</sub>] DMSO, δ(ppm)): 6.99 (ArH, 4H), 7.22 (ArH, 4H), 7.70 (ArH, 4H), 7.98 (ArH, 3H); 10.42 (CONH, 2H), 10.59 (CONH, 2H). **PI<sub>0</sub>:** Anal. Calcd. for C<sub>280</sub>H<sub>140</sub>N<sub>20</sub>O<sub>60</sub> (4740): C, 70.88%; N, 5.91%; H, 3.38%. Found: C, 69.38%; N, 5.86%; H, 3.33%.

**PAA<sub>1</sub>-S2:** <sup>1</sup>H NMR (400 MHz, [D<sub>6</sub>] DMSO, δ(ppm)): 3.39 (SCH<sub>2</sub>, 2H), 3.83 (OCH<sub>3</sub>, 3H), 4.22 (OCH<sub>2</sub>, 2H), 5.18 (ArH, 1H), 7.07 (ArH, 4H), 7.24 (ArH, 4H), 7.48 (ArH,4H), 7.65 (ArH, 4H), 7.82 (ArH,4H), 7.95 (ArH, 4H), 10.40 (CONH, 2H), 10.71 (CONH, 2H), 13.23 (COOH, 4H). **PI<sub>1</sub>-S2:** Anal. Calcd. for C<sub>287</sub>H<sub>148</sub>N<sub>24</sub>O<sub>61</sub>S (4936): C, 69.77%; N, 6.81%; H, 2.99%. Found: C, 68.58%; N, 6.80%; H, 3.42%.

**PAA<sub>2</sub>-S2:** <sup>1</sup>H NMR (400 MHz, [D<sub>6</sub>] DMSO, δ(ppm)): 3.36 (SCH<sub>2</sub>, 2H), 3.81

(OCH<sub>3</sub>, 3H), 4.24 (OCH<sub>2</sub>, 2H), 5.16 (ArH, 1H), 7.01 (ArH, 4H), 7.25 (ArH, 4H), 7.48 (ArH, 4H), 7.67 (ArH, 4H), 7.83 (ArH, 4H), 7.96 (ArH, 4H), 10.37 (CONH, 2H), 10.61 (CONH, 2H), 13.19 (COOH, 4H). **PI<sub>2</sub>-S2**: Anal. Calcd. for C<sub>294</sub>H<sub>156</sub>N<sub>28</sub>O<sub>62</sub>S<sub>2</sub> (5133): C, 68.73%; N, 7.64%; H, 3.04%. Found: C, 68.47%; N, 7.43%; H, 3.27%.

**PAA<sub>3</sub>-S2**: <sup>1</sup>H NMR (400 MHz, [D<sub>6</sub>] DMSO, δ(ppm)): 3.37 (SCH<sub>2</sub>, 2H), 3.79 (OCH<sub>3</sub>, 3H), 4.27 (OCH<sub>2</sub>, 2H), 5.09 (ArH, 1H), 7.08 (ArH, 4H), 7.23 (ArH, 4H), 7.47 (ArH, 4H), 7.65 (ArH, 4H), 7.81 (ArH, 4H), 7.94 (ArH, 4H), 10.33 (CONH, 2H), 10.51 (CONH, 2H), 13.25 (COOH, 4H). **PI<sub>3</sub>-S2**: Anal. Calcd. for C<sub>301</sub>H<sub>164</sub>N<sub>32</sub>O<sub>63</sub>S<sub>3</sub> (5329): C, 67.78%; N, 8.41%; H, 3.08%. Found: C, 67.39%; N, 8.24%; H, 3.37%.

**PAA<sub>1</sub>-S4**: <sup>1</sup>H NMR (400 MHz, [D<sub>6</sub>] DMSO, δ(ppm)): 1.80 (SCH<sub>2</sub>CH<sub>2</sub>, 2H), 1.85 (CH<sub>2</sub>CH<sub>2</sub>O, 2H), 3.04 (SCH<sub>2</sub>, 2H), 3.83 (OCH<sub>3</sub>, 3H), 4.08 (OCH<sub>2</sub>, 2H), 5.18 (ArH, 1H), 6.93 (ArH, 4H), 7.11 (ArH, 4H), 7.21 (ArH, 4H), 7.46 (ArH, 4H), 7.64 (ArH, 4H), 7.93 (ArH, 4H), 10.34 (CONH, 2H), 10.42 (CONH, 2H), 13.25 (COOH, 4H). **PI<sub>1</sub>-S4**: Anal. Calcd. for C<sub>289</sub>H<sub>152</sub>N<sub>24</sub>O<sub>61</sub>S (4965): C, 69.85%; N, 6.77%; H, 3.06%. Found: C, 69.27%; N, 6.83%; H, 3.32%.

**PAA<sub>2</sub>-S4**: <sup>1</sup>H NMR (400 MHz, [D<sub>6</sub>] DMSO, δ(ppm)): 1.77 (SCH<sub>2</sub>CH<sub>2</sub>, 2H), 1.84 (CH<sub>2</sub>CH<sub>2</sub>O, 2H), 3.08 (SCH<sub>2</sub>, 2H), 3.83 (OCH<sub>3</sub>, 3H), 4.08 (OCH<sub>2</sub>, 2H), 5.16 (ArH, 1H), 6.92 (ArH, 4H), 7.08 (ArH, 4H), 7.27 (ArH, 4H), 7.43 (ArH, 4H), 7.72 (ArH, 4H), 7.98 (ArH, 4H), 10.40 (CONH, 2H), 10.64 (CONH, 2H), 13.17 (COOH, 4H). **PI<sub>2</sub>-S4**: Anal. Calcd. for C<sub>298</sub>H<sub>164</sub>N<sub>28</sub>O<sub>62</sub>S<sub>2</sub> (5189): C, 68.92%; N, 7.55%; H, 3.16%. Found: C, 68.26%; N, 7.42%; H, 3.46%.

**PAA<sub>3</sub>-S4**: <sup>1</sup>H NMR (400 MHz, [D<sub>6</sub>] DMSO, δ(ppm)): 1.75 (SCH<sub>2</sub>CH<sub>2</sub>, 2H), 1.83 (CH<sub>2</sub>CH<sub>2</sub>O, 2H), 3.06 (SCH<sub>2</sub>, 2H), 3.83 (OCH<sub>3</sub>, 3H), 4.08 (OCH<sub>2</sub>, 2H), 5.17 (ArH, 1H), 6.94 (ArH, 4H), 7.10 (ArH, 4H), 7.24 (ArH, 4H), 7.43 (ArH, 4H), 7.70 (ArH, 4H), 7.94 (ArH, 4H), 10.37 (CONH, 2H), 10.41 (CONH, 2H), 13.19 (COOH, 4H). **PI<sub>3</sub>-S4**: Anal. Calcd. for C<sub>307</sub>H<sub>176</sub>N<sub>32</sub>O<sub>63</sub>S<sub>3</sub> (5413): C, 68.06%; N, 8.28%; H, 3.25%. Found: C, 67.92%; N, 8.16%; H, 3.17%.

**PAA<sub>2</sub>-S6**: <sup>1</sup>H NMR (400 MHz, [D<sub>6</sub>] DMSO, δ(ppm)): 1.41–1.43 (OCH<sub>2</sub>CH<sub>2</sub>C<sub>2</sub>H<sub>4</sub>CH<sub>2</sub>CH<sub>2</sub>S, 4H), 1.60 (SCH<sub>2</sub>CH<sub>2</sub>, 2H), 1.75 (OCH<sub>2</sub>CH<sub>2</sub>, 2H), 2.98 (SCH<sub>2</sub>, 2H), 3.85 (OCH<sub>3</sub>, 3H), 4.06 (OCH<sub>2</sub>, 2H), 5.14 (ArH, 1H), 7.11 (ArH, 4H), 7.23 (ArH, 4H), 7.52 (ArH, 4H), 7.71 (ArH, 4H), 7.80 (ArH, 4H), 7.93 (ArH, 4H), 10.36 (CONH, 2H), 10.41 (CONH, 2H), 13.13 (COOH, 4H). **PI<sub>2</sub>-S6**: Anal. Calcd. for C<sub>302</sub>H<sub>172</sub>N<sub>28</sub>O<sub>62</sub>S<sub>2</sub> (5245): C, 69.09%; N, 7.47%; H, 3.28%. Found: C, 68.31%; N, 7.26%; H, 3.89%.

**PAA<sub>3</sub>-S6**: <sup>1</sup>H NMR (400 MHz, [D<sub>6</sub>] DMSO, δ(ppm)): 1.41–1.45 (OCH<sub>2</sub>CH<sub>2</sub>C<sub>2</sub>H<sub>4</sub>CH<sub>2</sub>CH<sub>2</sub>S, 4H), 1.62 (SCH<sub>2</sub>CH<sub>2</sub>, 2H), 1.75 (OCH<sub>2</sub>CH<sub>2</sub>, 2H), 2.95 (SCH<sub>2</sub>, 2H), 3.83 (OCH<sub>3</sub>, 3H), 4.05 (OCH<sub>2</sub>, 2H), 5.17 (ArH, 1H), 7.10 (ArH, 4H), 7.22 (ArH, 4H), 7.53 (ArH, 4H), 7.67 (ArH, 4H), 7.81 (ArH, 4H), 7.93 (ArH, 4H), 10.34 (CONH, 2H), 10.43 (CONH, 2H), 13.03 (COOH, 4H). **PI<sub>3</sub>-S6**: Anal. Calcd. for C<sub>313</sub>H<sub>188</sub>N<sub>32</sub>O<sub>63</sub>S<sub>3</sub> (5497): C, 68.33%; N, 8.15%; H, 3.42%. Found: C, 67.92%; N, 8.06%; H, 3.63%.

**PAA<sub>1</sub>-S9**: <sup>1</sup>H NMR (400 MHz, [D<sub>6</sub>] DMSO, δ(ppm)): 1.73–1.35 (OCH<sub>2</sub>C<sub>7</sub>H<sub>14</sub>CH<sub>2</sub>S, 14H), 2.94 (SCH<sub>2</sub>, 2H), 3.77 (OCH<sub>3</sub>, 3H), 3.99 (OCH<sub>2</sub>, 2H), 5.17 (ArH, 1H), 6.92 (ArH, 4H), 7.11 (ArH, 4H), 7.24 (ArH, 4H), 7.45 (ArH, 4H), 7.67

(ArH,4H), 7.97 (ArH, 4H), 10.38 (CONH, 2H), 10.44 (CONH, 2H), 13.18 (COOH, 4H). **PI<sub>1</sub>-S9**: Anal. Calcd. for C<sub>294</sub>H<sub>162</sub>N<sub>24</sub>O<sub>61</sub>S (5035): C, 76.74%; N, 8.89%; H, 4.09%. Found: C, 75.37%; N, 8.73%; H, 4.18%.

**PAA<sub>2</sub>-S9**: <sup>1</sup>H NMR (400 MHz, [D<sub>6</sub>] DMSO, δ(ppm)): 1.71–1.34 (OCH<sub>2</sub>C<sub>7</sub>H<sub>14</sub>CH<sub>2</sub>S, 14H), 2.93 (SCH<sub>2</sub>, 2H), 3.76 (OCH<sub>3</sub>, 3H), 4.02 (OCH<sub>2</sub>, 2H), 5.16 (ArH, 1H), 6.91 (ArH, 4H), 7.10 (ArH, 4H), 7.26 (ArH,4H), 7.43 (ArH, 4H), 7.66 (ArH,4H), 7.93 (ArH, 4H), 10.37 (CONH, 2H), 10.41 (CONH, 2H), 13.26 (COOH, 4H). **PI<sub>2</sub>-S9**: Anal. Calcd. for C<sub>308</sub>H<sub>184</sub>N<sub>28</sub>O<sub>62</sub>S<sub>2</sub> (5329): C, 69.36%; N, 7.35%; H, 3.45%. Found: C, 69.71%; N, 7.17%; H, 3.39%.

**PAA<sub>3</sub>-S9**: <sup>1</sup>H NMR (400 MHz, [D<sub>6</sub>] DMSO, δ(ppm)): 1.73–1.32 (OCH<sub>2</sub>C<sub>7</sub>H<sub>14</sub>CH<sub>2</sub>S, 14H), 2.94 (SCH<sub>2</sub>, 2H), 3.75 (OCH<sub>3</sub>, 3H), 4.05 (OCH<sub>2</sub>, 2H), 5.19 (ArH, 1H), 6.94 (ArH, 4H), 7.12 (ArH, 4H), 7.25 (ArH,4H), 7.40 (ArH, 4H), 7.68 (ArH,4H), 8.02 (ArH, 4H), 10.35 (CONH, 2H), 10.42 (CONH, 2H), 13.11 (COOH, 4H). **PI<sub>3</sub>-S9**: Anal. Calcd. for C<sub>322</sub>H<sub>206</sub>N<sub>32</sub>O<sub>63</sub>S<sub>3</sub> (5623): C, 68.72%; N, 7.97%; H, 3.66%. Found: C, 68.37%; N, 7.87%; H, 3.94%.
